# Supplementary material for: Content analysis of Advance Directives completed by patients with advanced cancer as part of an Advance Care Planning intervention: insights gained from the ACTION trial
Source: PubMed Central journal article supplement (PMC6989617; doi:10.1007/s00520-019-04956-1), 2019-07-05
Supplement: 520_2019_4956_MOESM4_ESM.pdf [file 520_2019_4956_MOESM4_ESM.pdf]

**Article title:** Content analysis of Advance Directives completed by patients with advanced cancer as part of an Advance Care Planning intervention: insights gained from the ACTION trial

**Journal name:** Journal of supportive care in cancer

**Author names;** M. Zwakman, J.J.M. van Delden, G. Caswell, C.A. Christensen, L. Deliens, F. Ingravallo, L.J. Jabbarian, A.T. Johnsen, I. J. Korfage, A. Mimić, N.J. Preston, M.C. Kars. On behalf of the ACTION consortium.

**Affiliation of the corresponding author:**  
Julius Center for Health Sciences and Primary Care, University Medical Center  
Utrecht, the Netherlands

**E-mail address of the corresponding author:**  
m.zwakman@umcutrecht.nl

**Supplementary 2. Code tree**

|                                     | <b>Category</b>                       | <b>Code</b>                   | <b>Subcode</b>                |
|-------------------------------------|---------------------------------------|-------------------------------|-------------------------------|
| <b>Section A: living well</b>       |                                       |                               |                               |
|                                     | Maintaining normal life               |                               |                               |
|                                     |                                       | Keeping the daily routine     |                               |
|                                     |                                       | Feeling healthy               |                               |
|                                     |                                       | Enjoying life                 |                               |
|                                     | Undertaking activities                |                               |                               |
|                                     |                                       | Daily activities              |                               |
|                                     |                                       |                               | Gardening                     |
|                                     |                                       |                               | Walking                       |
|                                     |                                       |                               | Shopping                      |
|                                     |                                       |                               | Hobby                         |
|                                     |                                       |                               | Eating & drinking             |
|                                     |                                       | Special activities            |                               |
|                                     | Being independent                     |                               | Holiday                       |
|                                     |                                       | Being able to communicate     |                               |
|                                     |                                       | Remain mentally competent     |                               |
|                                     |                                       | Remain physically independent |                               |
|                                     | Experiencing meaningful relationships |                               |                               |
|                                     |                                       | Family                        |                               |
|                                     |                                       | Friends                       |                               |
|                                     |                                       | Being of meaning              |                               |
|                                     |                                       |                               | To other people               |
|                                     |                                       |                               | Work                          |
|                                     | Being free from pain                  |                               |                               |
|                                     | Additional aspects of living well     |                               |                               |
|                                     |                                       | Nature                        |                               |
|                                     |                                       | No worries, peace, no stress  |                               |
| <b>Section A: Worries and fears</b> |                                       |                               |                               |
|                                     | Patient Worries                       |                               |                               |
|                                     |                                       | Disease progression           |                               |
|                                     |                                       |                               | Physical decline              |
|                                     |                                       |                               | A fear of frightening moments |
|                                     |                                       |                               | Hopeless suffering            |
|                                     |                                       |                               | Being dependent               |
|                                     |                                       |                               | Being in a vegetative state   |
|                                     |                                       | Unpredictability              |                               |
|                                     |                                       |                               | Effect treatment              |
|                                     |                                       |                               | Time left                     |

|                           |                          |                                              |  |
|---------------------------|--------------------------|----------------------------------------------|--|
|                           |                          | Final place of care                          |  |
|                           |                          | Unable to maintain normal life               |  |
|                           | Worries about loved ones |                                              |  |
|                           |                          | Worries about relatives                      |  |
|                           |                          | Being a burden                               |  |
|                           | No worries               |                                              |  |
|                           | Additional worries/fears |                                              |  |
| <b>Section A: Beliefs</b> |                          |                                              |  |
|                           | Religious beliefs        |                                              |  |
|                           |                          | Value                                        |  |
|                           |                          | Take into account                            |  |
|                           |                          | Atheist                                      |  |
|                           | Personal beliefs         |                                              |  |
|                           | Spiritual beliefs        |                                              |  |
|                           | No beliefs               |                                              |  |
|                           | Additional information   |                                              |  |
| <b>Section B: Hopes</b>   |                          |                                              |  |
|                           | Prolonging life          |                                              |  |
|                           |                          | Cure                                         |  |
|                           |                          | Miracle                                      |  |
|                           |                          | Shrink of the tumor                          |  |
|                           |                          | Being stable                                 |  |
|                           |                          | Maintain/improve physical condition          |  |
|                           |                          | Being able to be present at a special moment |  |
|                           |                          | Benefit from new treatment                   |  |
|                           | Burden of disease        |                                              |  |
|                           |                          | Relieve symptoms                             |  |
|                           |                          | No suffering                                 |  |
|                           | Preserving independency  |                                              |  |
|                           |                          | Staying mentally competent                   |  |
|                           |                          | Being able to communicate                    |  |
|                           | Being looked after       |                                              |  |
|                           |                          | Communication with health care professionals |  |
|                           |                          | Appointments with health care professionals  |  |
|                           | In case of deterioration |                                              |  |
|                           |                          | Goals of care                                |  |
|                           |                          | Place of care                                |  |
|                           |                          | Dying with dignity                           |  |
|                           | Quality of life          |                                              |  |
|                           |                          | Maintaining normal life                      |  |
|                           |                          | Enjoying life                                |  |
|                           |                          | Family                                       |  |
|                           | State of mind            |                                              |  |

|                                                                                                       |                                                   |                      |                                            |
|-------------------------------------------------------------------------------------------------------|---------------------------------------------------|----------------------|--------------------------------------------|
|                                                                                                       |                                                   | Trust in doctors     |                                            |
|                                                                                                       |                                                   | Staying positive     |                                            |
|                                                                                                       |                                                   | Fighting             |                                            |
|                                                                                                       | No hope                                           |                      |                                            |
|                                                                                                       | Additional hopes                                  |                      |                                            |
| <b>Section F: My other preferences that I consider important to be known by those who care for me</b> |                                                   |                      |                                            |
|                                                                                                       | Additional information to section A, B, C, D or E |                      |                                            |
|                                                                                                       | Treatment                                         |                      |                                            |
|                                                                                                       |                                                   | No endless treatment |                                            |
|                                                                                                       |                                                   | Alternative medicine |                                            |
|                                                                                                       |                                                   | Euthanasia           |                                            |
|                                                                                                       | Stage of deterioration and dying                  |                      |                                            |
|                                                                                                       |                                                   | Visits               |                                            |
|                                                                                                       |                                                   | Family               |                                            |
|                                                                                                       |                                                   | Dignity              |                                            |
|                                                                                                       | After-death arrangements                          |                      |                                            |
|                                                                                                       |                                                   | Funeral              |                                            |
|                                                                                                       |                                                   |                      | Giving substance to the funeral            |
|                                                                                                       |                                                   |                      | Decision about the location of the funeral |
|                                                                                                       |                                                   | Organ donation       |                                            |
|                                                                                                       | No other preferences                              |                      |                                            |
|                                                                                                       | Additional preferences                            |                      |                                            |
